# Supplementary material for: Comprehensive analysis of fatty acid metabolism-related gene signatures for predicting prognosis in patients with prostate cancer
Source: PeerJ journal article supplement (doi:10.7717/peerj.14646), 2023-01-10

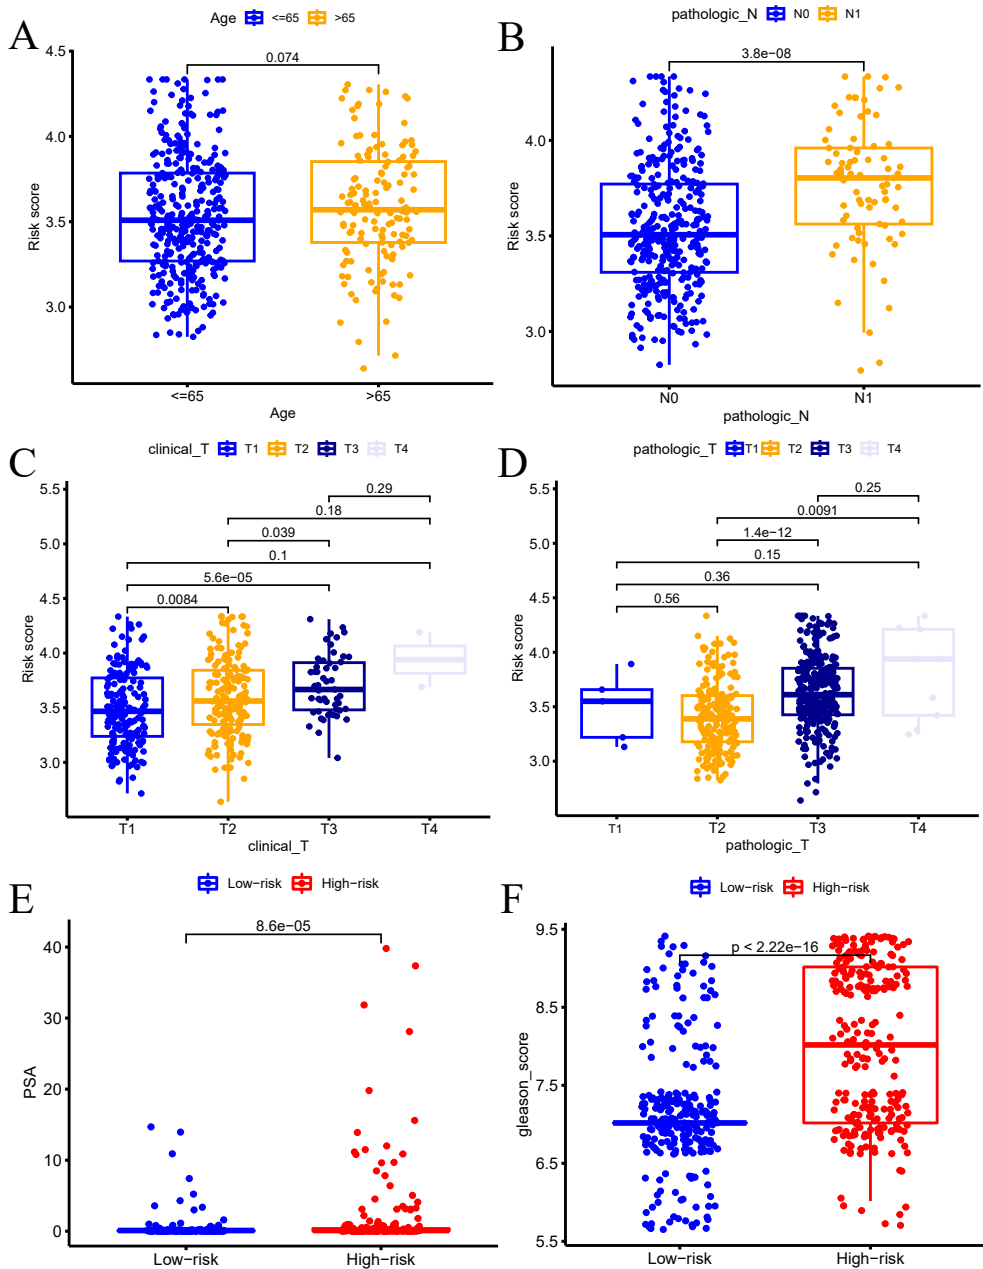

Supplement: Fig_S1.pdf [file Fig_S1.pdf]
